# Supplementary material
Source: publisher figshare collection journal article supplement (https://frontiersin.figshare.com/ndownloader/files/26020550)

*Supplementary Material*

**A *Burkholderia thailandensis* DedA family membrane protein is required for proton motive force dependent lipid A modification**

**Pradip R. Panta and William T. Doerrler\***

Department of Biological Sciences, Louisiana State University, Baton Rouge, LA, USA

**\* Correspondence:**

William T. Doerrler; [wdoerr@lsu.edu](mailto:wdoerr@lsu.edu)

Pradip R. Panta; [ppanta1@lsu.edu](mailto:ppanta1@lsu.edu)

**Keywords:** colistin; pH and antibiotic resistance; lipopolysaccharide; membrane protein; proton motive force, lipid A modification and pH

**Table S1. Bacterial strains and plasmids used in this study.**

| Strains                     | Description                                                                                                               | Source or Reference         |
|-----------------------------|---------------------------------------------------------------------------------------------------------------------------|-----------------------------|
| XL1 Blue                    | <i>recA1 endA1 gyrA96 thi-1 hsdR17 supE44 relA1 lac [F' proAB lacIqZAM15 Tn10 (Tet<sup>R</sup>)</i>                       | Stratagene                  |
| <i>E. coli</i> RHO3         | SM10(lambda <i>pir</i> ), kan <sup>S</sup> ; $\Delta asd::FRT \Delta aphA::FRT$                                           | (Lopez et al., 2009)        |
| E264                        | Wild-type <i>Burkholderia thailandensis</i>                                                                               | (Brett et al., 1998)        |
| $\Delta dbcA::FRT$          | E264 $\Delta dbcA::FRT$                                                                                                   | (Panta et al., 2019)        |
| E264;vec                    | E264 transformed with pSCrhaB2 Tmp <sup>R</sup>                                                                           | (Panta et al., 2019)        |
| $\Delta dbcA$ ;vec          | $\Delta dbcA::FRT$ transformed with pSCrhaB2 Tmp <sup>R</sup>                                                             | (Panta et al., 2019)        |
| E264; <i>dbcA</i>           | E264 transformed with pSC <i>dbcA</i>                                                                                     | (Panta et al., 2019)        |
| $\Delta dbcA$ ; <i>dbcA</i> | $\Delta dbcA::FRT$ transformed with pSC <i>dbcA</i>                                                                       | (Panta et al., 2019)        |
| E264B                       | E264- <i>PrhaB::arnB-BTH_I2189</i>                                                                                        | This study                  |
| E264T                       | E264- <i>PrhaB::BTH_2196-BTH_I2194</i>                                                                                    | This study                  |
| $\Delta dbcAB$              | $\Delta dbcAB$ - <i>PrhaB::arnB-BTH_I2189</i>                                                                             | This study                  |
| $\Delta dbcAT$              | $\Delta dbcAB$ - <i>PrhaB::BTH_2196-BTH_I2194</i>                                                                         | This study                  |
| <b>Plasmids</b>             |                                                                                                                           |                             |
| pSCrhaB2                    | Expression vector; ori <sub>pBBR1</sub> <i>rhaR</i> , <i>rhaS</i> , <i>P<sub>rhaB</sub></i> Tmp <sup>R</sup> <i>mob</i> + | (Cardona and Valvano, 2005) |
| pSC <i>dbcA</i>             | pSCrhaB2 expressing <i>dbcA</i> with His <sub>6</sub> tag at C terminus                                                   | (Panta et al., 2019)        |

|              |                                                                                        |                       |
|--------------|----------------------------------------------------------------------------------------|-----------------------|
| pSCuppP1     | pSCrhaB2 expressing BTH_I1512 with His <sub>6</sub> tag at C terminus                  | This study            |
| pSCuppP2     | pSCrhaB2 expressing BTH_I2750 with His <sub>6</sub> tag at C terminus                  | This study            |
| pSC200       | Tmp <sup>R</sup> mob <sup>+</sup> Ori <sub>R6K</sub> <i>rhaR rhaA P<sub>rhaB</sub></i> | (Ortega et al., 2007) |
| pSC200Ara4NB | pSC200 cloned with 290bp portion of <i>BTH_I2193</i> ( <i>arnB</i> )                   | This study            |
| pSC200Ara4NT | pSC200 cloned with 330 bp portion of <i>BTH_I2196</i>                                  | This study            |

**Table S2. Oligonucleotide primers used in this study.**

| Primer name      | Primer Sequence (5' → 3')                   |
|------------------|---------------------------------------------|
| FWAra4NB         | ATATAAC <u>CATATG</u> AGCCAGACTTCCGTTCTTTC  |
| REVAra4NB        | ATATAAT <u>CTAGAC</u> GTCTCGAGGATCACGTTGCTC |
| FWAra4NT         | ATATAT <u>CATATG</u> CACCAACCCGGCC          |
| REVAra4NT        | ATATAAT <u>CTAGAG</u> TTCGAGCAGCATCGCGAAG   |
| ConfirmAra4NBFW  | CGAAATAGTAATCACGAGGTCAGGTTC                 |
| ConfirmAra4NTFW  | CGAAATAGTAATCACGAGGTCAGGTTC                 |
| ConfirmAra4NBREV | CCTTCGATCGACGTGATGTTCTTG                    |
| ConfirmAra4NTREV | CTGGAAATCCATCGTCTCGACG                      |

|                    |                                                    |
|--------------------|----------------------------------------------------|
| FWBTH_I2750        | ATATATA <u>CATATG</u> ATGAGCCTCTGGTTTCTGGTATTTCTG  |
| REVBTH_I2750       | ATATATA <u>AAGCTT</u> GAAATGCCAATGGCGGCAGATCAAAC   |
| FWBTH_I1512        | ATATTACATATGATGGACTGGATACTGATTTGCAAAGC             |
| REVBTH_I1512       | ATATATA <u>AAGCTT</u> TCAGATCCACTCGATCCAGCCGCTATAC |
| ConfirmpSCrhaB2FW  | CATCATCACGTTTCATCTTTCCTG                           |
| ConfirmpSCrhaB2REV | GCAAATTCTGTTTTATCAGACCGC                           |

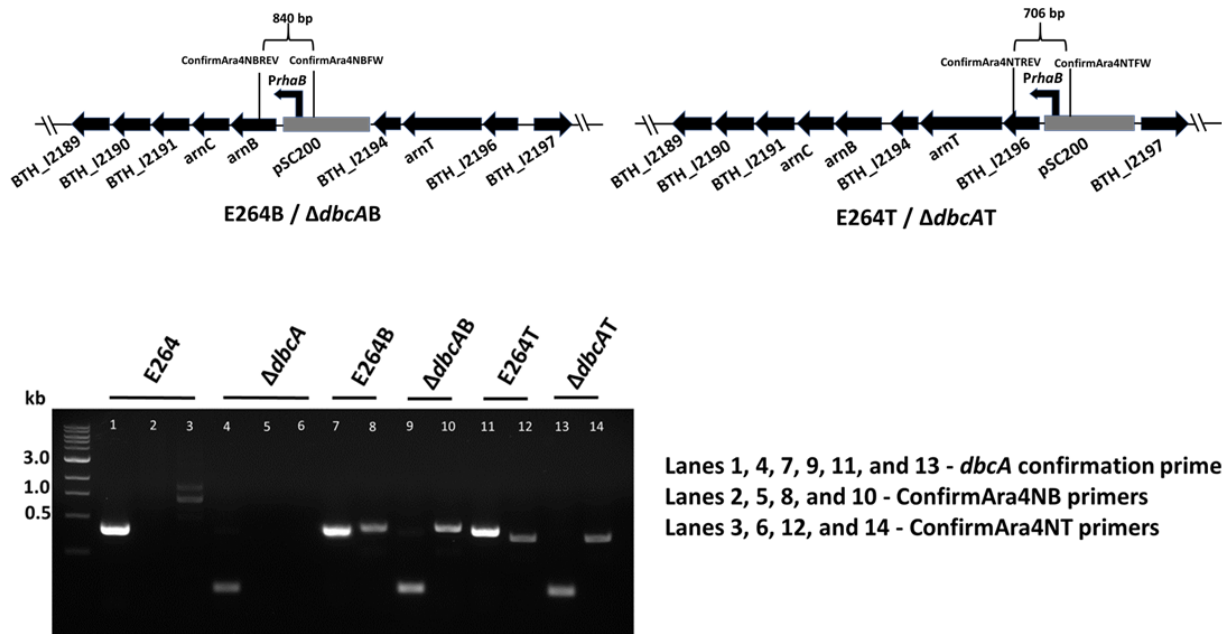

**Figure S1.** PCR confirmation of E264B/ $\Delta$ dbcAB and E264T/ $\Delta$ dbcAT strains. Listed primers were used to confirm *dbcA* deletion from E264B/ $\Delta$ dbcAB and E264T/ $\Delta$ dbcAT strains.

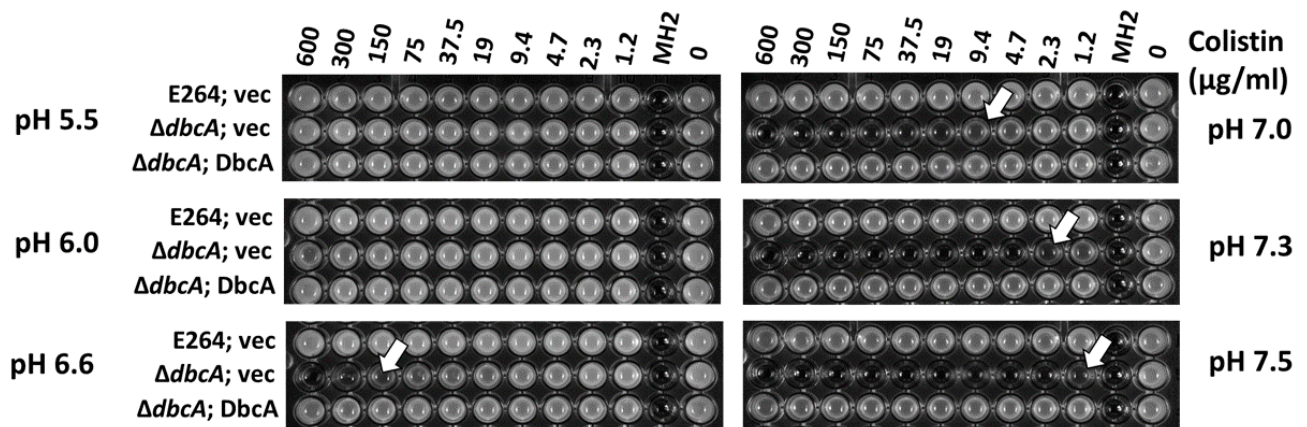

**Figure S2.** Minimal inhibitory concentration (MIC) using broth microdilution method. 1:100 dilutions from  $3 \times 10^8$  cells of indicated strains were inoculated in MH2 media at different pH with different amounts of colistin as indicated. 100mM MES was used for pH 5.5, 6.0, and 6.6 media. 70mM BTP was used for pH 7.0, 7.3, and 7.5. Plates were grown at 37°C and analyzed after 24 hours. Approximate MICs are denoted by white arrows.

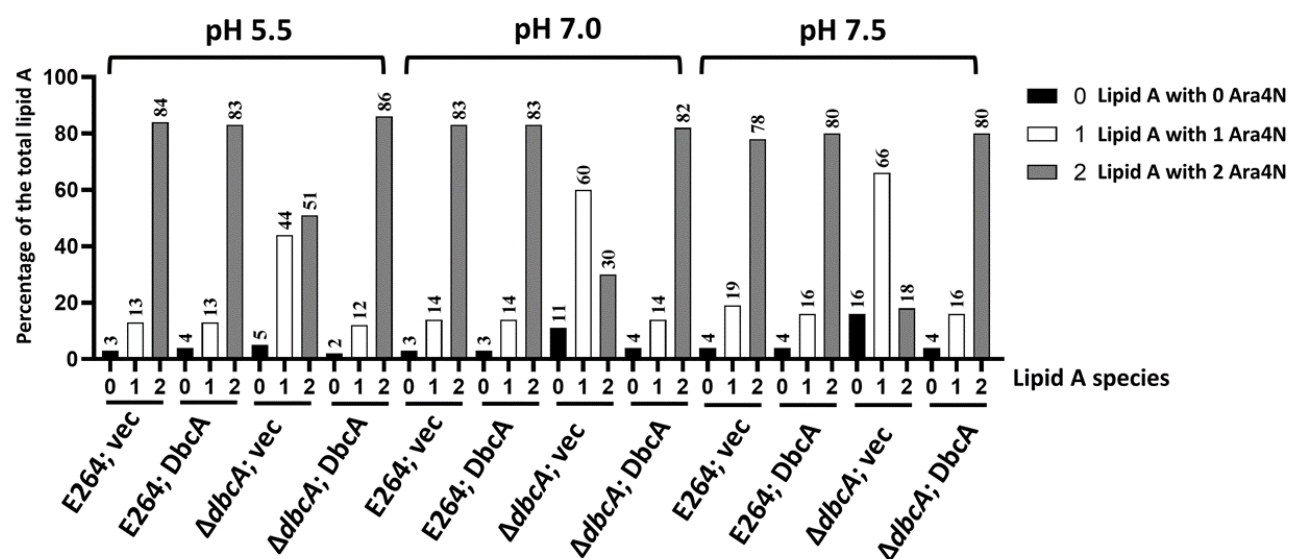

**Figure S3.** Percentage of the total lipid A for Figure 4B. Quantification as described in Materials and Methods.

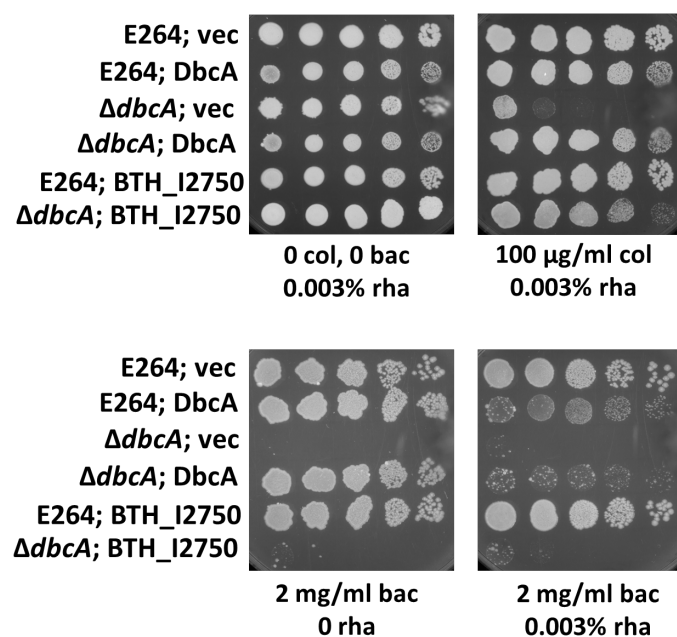

**Figure S4.** Overexpression of *dbcA* with 0.003% rhamnose is toxic to E264. 10-fold dilutions of indicated strains were spotted on LB containing 100 µg/ml Tmp, with 100 µg/ml of colistin or 2 mg/ml bacitracin and with or without 0.003% rhamnose. Plates were analyzed after 48 hours at 37°C.

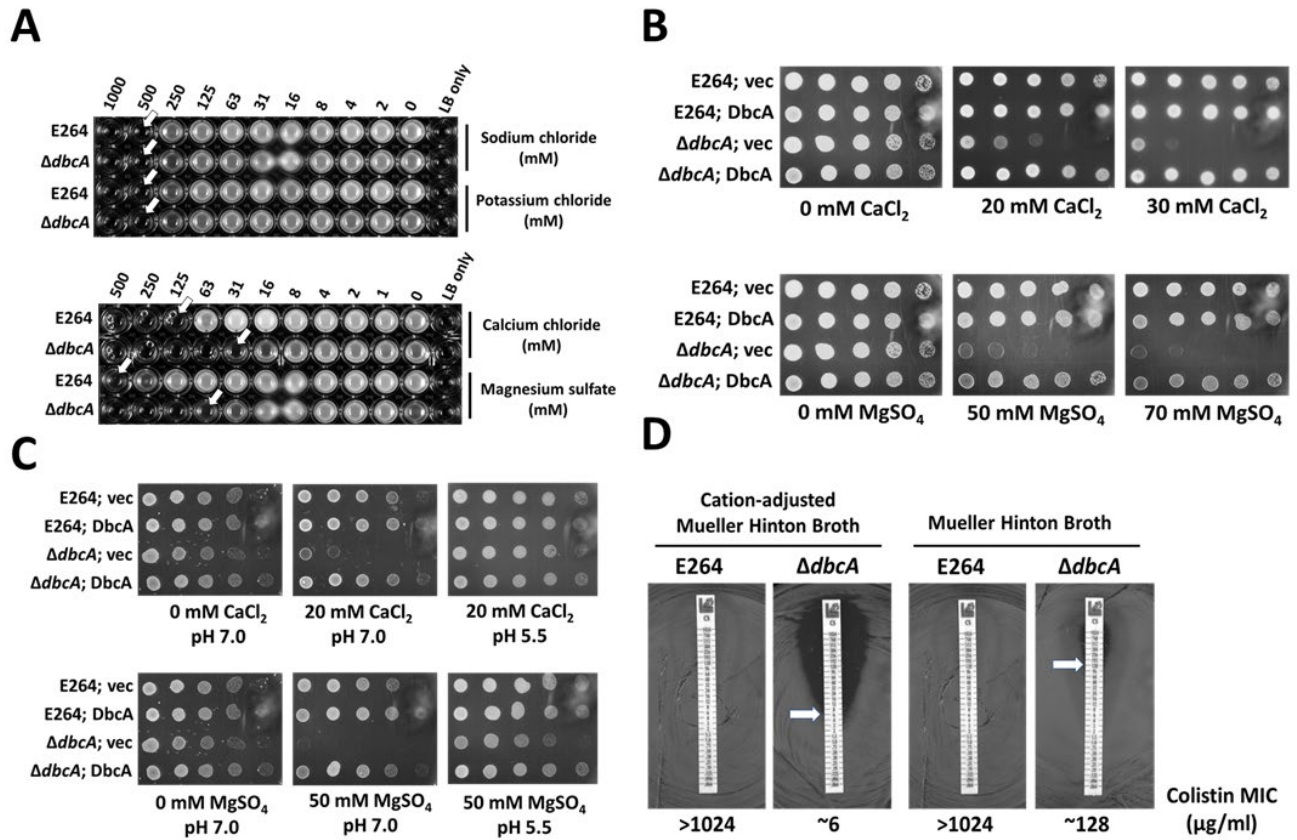

**Figure S5.** Sensitivity of  $\Delta dbcA$  to  $Ca^{++}$  and  $Mg^{++}$ . **(A)** MIC for different cations using broth microdilution method for E264 and  $\Delta dbcA$ . Approximate MICs are denoted by white arrows. **(B)** Sensitivity of  $\Delta dbcA$  to  $Ca^{++}$  and  $Mg^{++}$  on solid media. 1:10 dilutions of indicated strains were spotted on LB agar media with 100 Tmp, 0.002% rhamnose, and different concentrations of calcium chloride ( $CaCl_2$ ) and magnesium sulfate ( $MgSO_4$ ) as indicated. **(C)** Complementation of  $Ca^{++}$  and  $Mg^{++}$  sensitivity of  $\Delta dbcA$  by acidic pH media. 100mM Tris was used for pH 7.0 and 100mM MES was used for pH 5.5. **(D)** MIC using colistin E-test strips for E264 and  $\Delta dbcA$  on two different types of media plates. Approximate MICs are denoted by white arrows. Cation-adjusted Mueller Hinton Broth contains ~20-25 mg/l  $Ca^{++}$  and 10-12.5 mg/l  $Mg^{++}$ , whereas Mueller Hinton broth does not have added  $Ca^{++}$  and  $Mg^{++}$  salts. pH for both media were adjusted to 7.3 using NaOH and HCl to exclude the pH effect for this experiment.

**References:**

- Brett, P.J., DeShazer, D., and Woods, D.E. (1998). *Burkholderia thailandensis* sp. nov., a *Burkholderia pseudomallei*-like species. *Int J Syst Bacteriol* 48 Pt 1, 317-320. doi: 10.1099/00207713-48-1-317.
- Cardona, S.T., and Valvano, M.A. (2005). An expression vector containing a rhamnose-inducible promoter provides tightly regulated gene expression in *Burkholderia cenocepacia*. *Plasmid* 54(3), 219-228. doi: 10.1016/j.plasmid.2005.03.004.
- Lopez, C.M., Rhol, D.A., Trunck, L.A., and Schweizer, H.P. (2009). Versatile dual-technology system for markerless allele replacement in *Burkholderia pseudomallei*. *Appl Environ Microbiol* 75(20), 6496-6503. doi: 10.1128/AEM.01669-09.
- Ortega, X.P., Cardona, S.T., Brown, A.R., Loutet, S.A., Flannagan, R.S., Campopiano, D.J., et al. (2007). A putative gene cluster for aminoarabinose biosynthesis is essential for *Burkholderia cenocepacia* viability. *J Bacteriol* 189(9), 3639-3644. doi: 10.1128/JB.00153-07.
- Panta, P.R., Kumar, S., Stafford, C.F., Billiot, C.E., Douglass, M.V., Herrera, C.M., et al. (2019). A DedA Family Membrane Protein Is Required for *Burkholderia thailandensis* Colistin Resistance. *Frontiers in Microbiology* 10(2532). doi: 10.3389/fmicb.2019.02532.

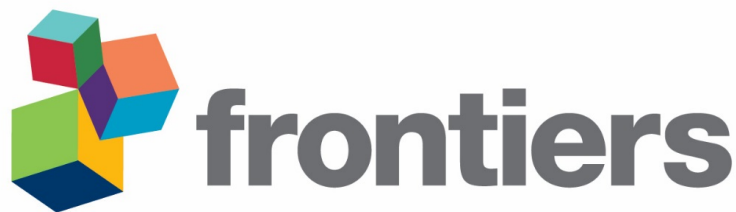

Supplement: Supplementary file [file 26020550]
